# Supplementary material
Source: PubMed Central journal article supplement (PMC5999407)
Supplement: NIHMS966921-supplement-ESI.pdf [file NIHMS966921-supplement-ESI.pdf]

Electronic Supplementary Information for:

**Optical Calorimetry in Microfluidic Droplets**

Jacob Chamoun, Ashish Pattekar, Farzaneh Afshinmanesh, Joerg Martini, and Michael I. Recht

ITC data

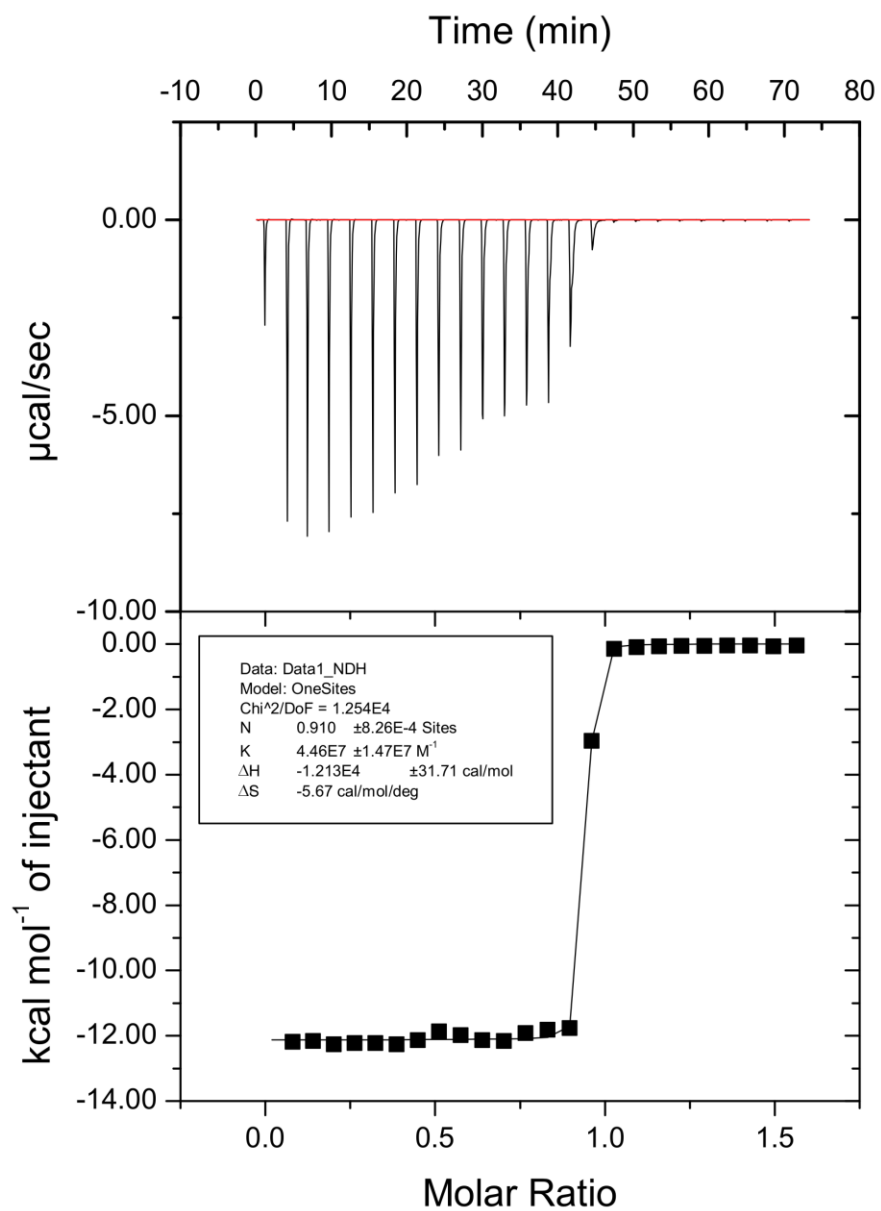

**Supplementary Figure 1:** Titration of EDTA with  $\text{CaCl}_2$ . Binding of  $\text{CaCl}_2$  to EDTA was measured at 25 °C in 100 mM Tris-HCl (pH 7.5), 0.015% (w/v) Triton X-100. The sample cell (200  $\mu\text{L}$ ) contained EDTA (500  $\mu\text{M}$ ), and the injection syringe contained 5 mM  $\text{CaCl}_2$ .

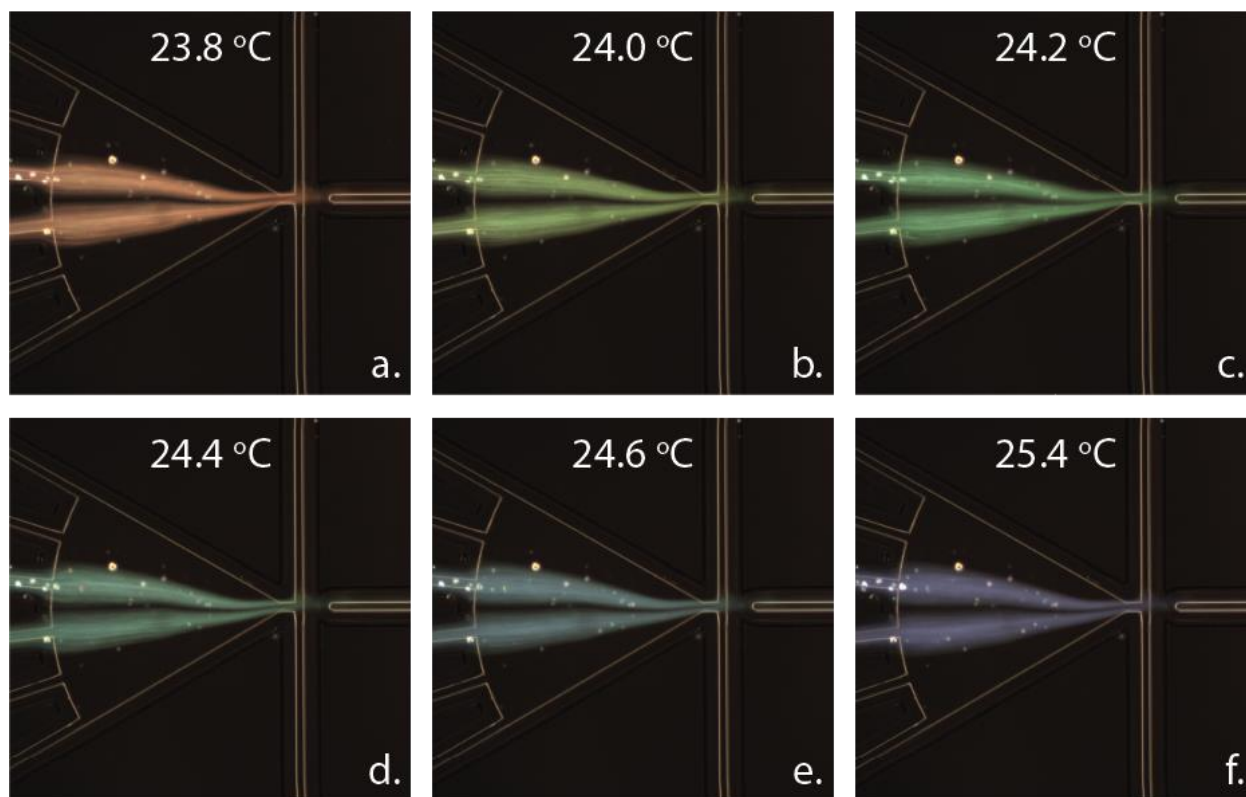

**Supplementary Figure 2:** Microphotograph of the color change of TLC microparticles in response to temperature. 5x objective,  $\approx 2$  sec exposure. Water/0.015% Triton X-100.

**Supplementary Table 1:** Mixing rates at various flow conditions. \*\* Some binding of fluo-4 to  $\text{Ca}^{2+}$  occurs prior to droplet generation

| Combined aqueous flow rate ( $\mu\text{l}/\text{min}$ ) | Novec 7500 flow rate ( $\mu\text{l}/\text{min}$ ) | Total fluid flux ( $\mu\text{l}/\text{sec}$ ) | Droplet generation rate (Hz) | Linear flow rate (mm/s) | Distance for 90% mixing (mm) | Time for 90% mixing (ms) |
|---------------------------------------------------------|---------------------------------------------------|-----------------------------------------------|------------------------------|-------------------------|------------------------------|--------------------------|
| 22.5                                                    | 37.3                                              | 0.997                                         | 716                          | 83.9                    | 0.75                         | 9                        |
| 15                                                      | 37.3                                              | 0.872                                         | 477                          | 73.4                    | 0.70                         | 10                       |
| 12                                                      | 37.3                                              | 0.822                                         | 382                          | 69.2                    | **                           | NA                       |
| 9                                                       | 37.3                                              | 0.772                                         | 286                          | 64.9                    | **                           | NA                       |
| 6                                                       | 37.3                                              | 0.722                                         | 191                          | 60.7                    | **                           | NA                       |

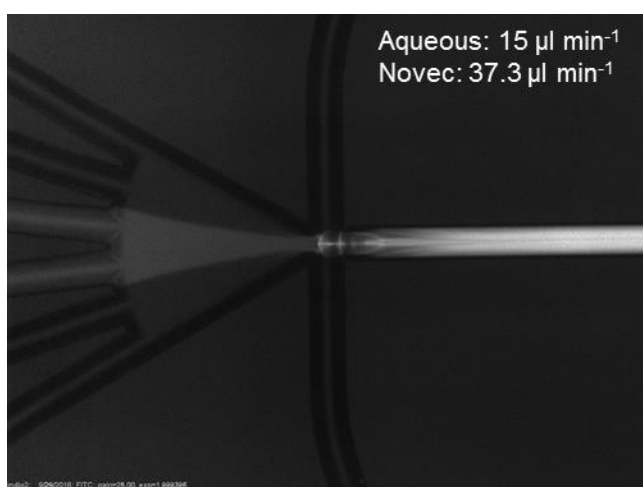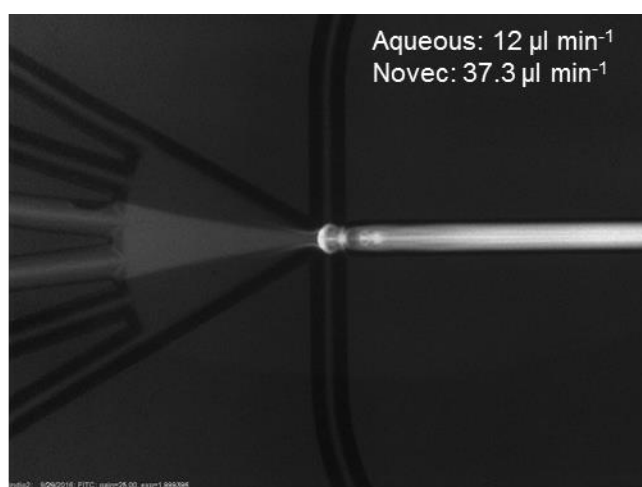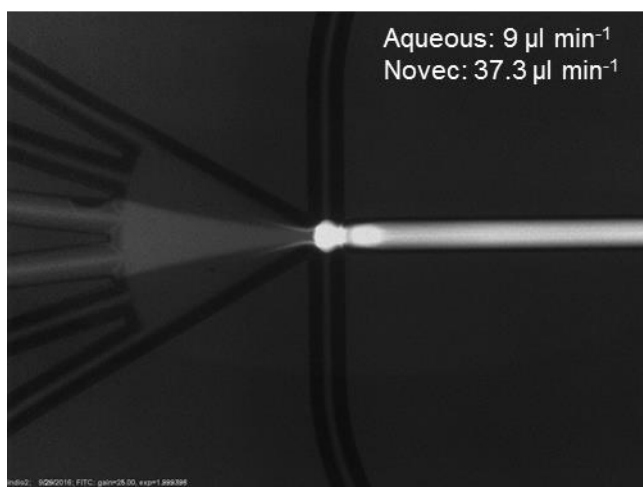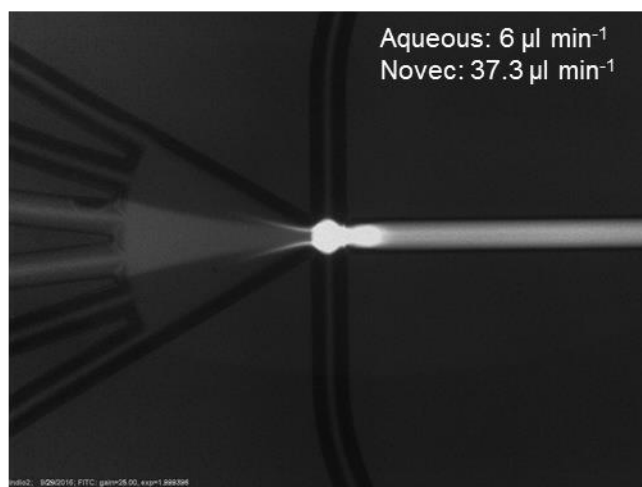

**Supplementary Figure 3:** Microphotograph (2 s exposure, individual droplets are invisible) showing time-averaged fluorescence arising from mixing inside droplets formed by combining equal volumes of  $\text{CaCl}_2$  (5 mM), EDTA (1 mM), and Fluo-4 (54  $\mu\text{M}$ ), in MOPS (20 mM, pH 7.2). Aqueous streams were in the same configuration as described in Figure 6 of the article.

**Supplementary Table 2:** Parameters used in the COMSOL model. Value of  $\Delta H$  was obtained from ITC measurements. Values for Novec 7500 from product data sheet (<http://multimedia.3m.com/mws/media/65496O/3mtm-novectm-7500-engineered-fluid.pdf>).

| Name           | Value     | Units                | Description                                       |
|----------------|-----------|----------------------|---------------------------------------------------|
| $T_{ref}$      | 298.15    | [K]                  | Reference temperature                             |
| $[EDTA]_0$     | 0.05      | [mol/liter]          | Initial concentration of EDTA                     |
| $[CaCl_2]_0$   | 1         | [mol/liter]          | Initial concentration of $CaCl_2$                 |
| $D_{EDTA}$     | 1.09E-09  | [m <sup>2</sup> /s]  | Diffusivity of EDTA in water                      |
| $D_{CaCl_2}$   | 1.09E-09  | [m <sup>2</sup> /s]  | Diffusivity of $CaCl_2$ in water                  |
| $k$            | 1.00E+07  | [1/((mol/liter)*s)]  | reaction kinetic rate constant                    |
| $\Delta H$     | -50578    | [J/mol]              | Heat of reaction, measured using ITC              |
| $K_{Novec}$    | 0.06477   | [W/m*K]              | Thermal conductivity of Novec 7500 at $T_{ref}$   |
| $K_w$          | 0.607     | [W/m*K]              | Thermal conductivity of water at $T_{ref}$        |
| $C_{pNovec}$   | 1128.455  | [J/kg*K]             | Specific heat capacity of Novec 7500 at $T_{ref}$ |
| $C_{pw}$       | 4138      | [J/kg*K]             | Specific heat capacity of water at $T_{ref}$      |
| $\rho_{Novec}$ | 1613.6875 | [kg/m <sup>3</sup> ] | Density of Novec 7500 at $T_{ref}$                |
| $\rho_w$       | 997       | [kg/m <sup>3</sup> ] | Density of water at $T_{ref}$                     |

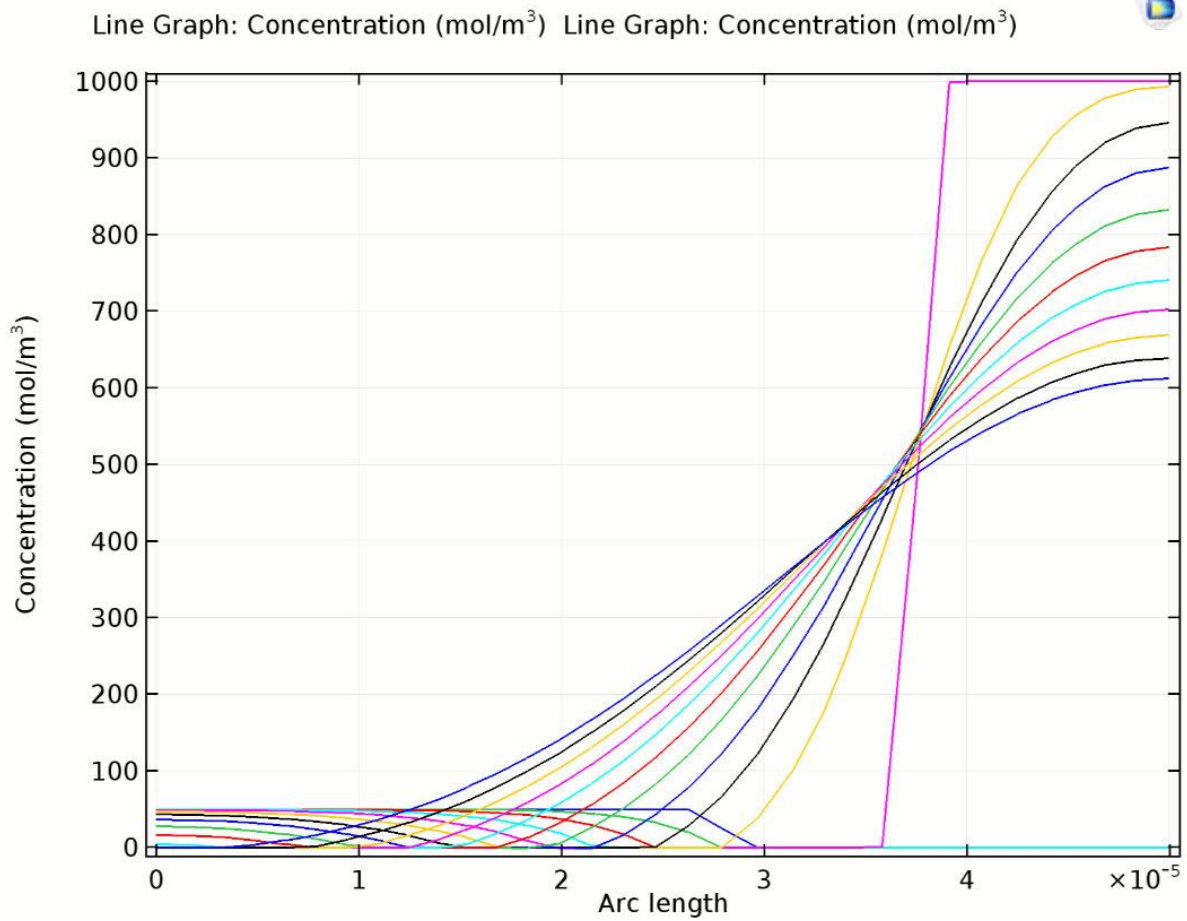

**Supplementary Figure 4:** Concentration profiles of EDTA (initial 50 mM) and CaCl<sub>2</sub> (initial 1 M) over time for the 'with spacer' condition (for t = 0 through t = 100 ms at 10 ms time steps).

Line Graph: Concentration (mol/m<sup>3</sup>) Line Graph: Concentration (mol/m<sup>3</sup>)

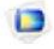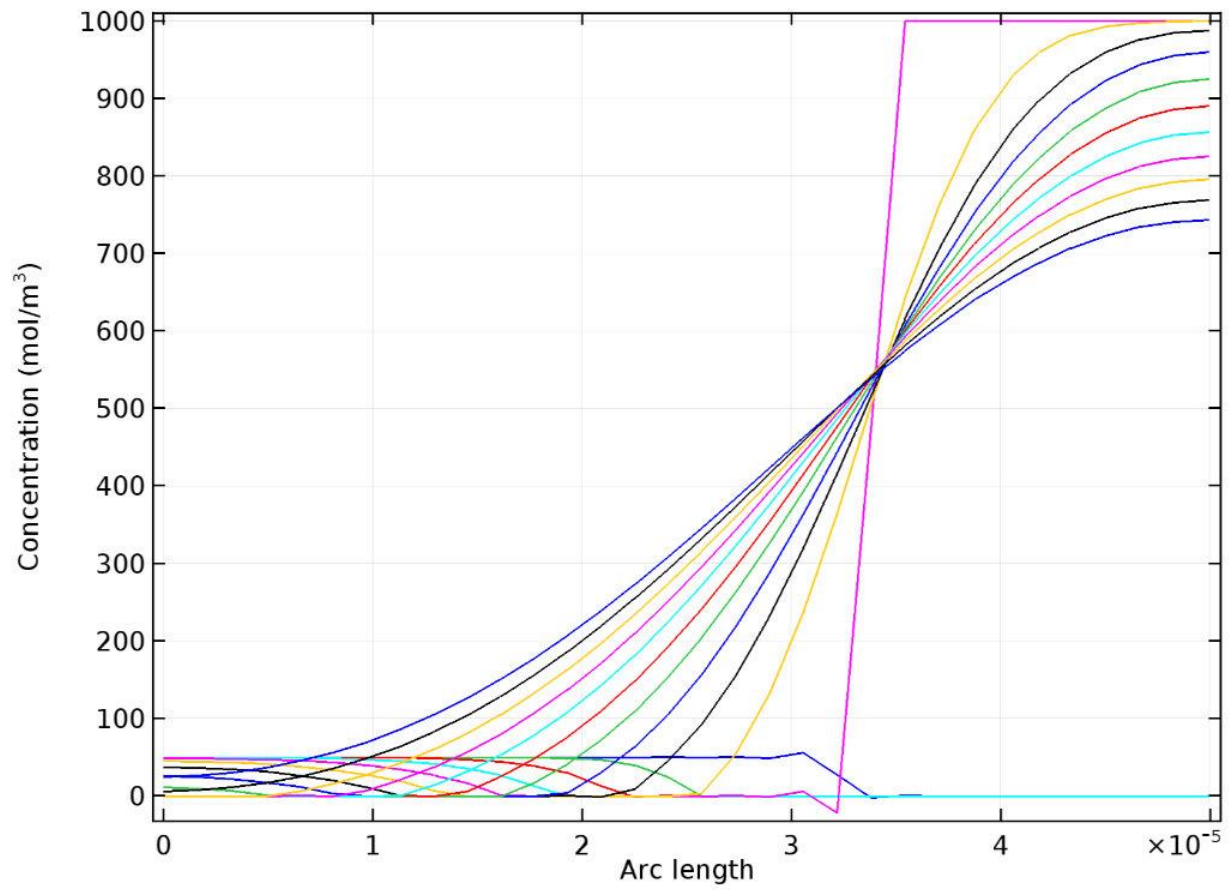

**Supplementary Figure 5:** Concentration profiles of EDTA (initial 50 mM) and CaCl<sub>2</sub> (initial 1 M) over time for the 'no spacer' condition (for t = 0 through t = 100 ms at 10 ms time steps).
